# Supplementary material for: Phosphotungstic Acid-Modified MnOx for Selective Catalytic Reduction of NOx with NH3
Source: MDPI journal article supplement (doi:10.3390/catal12101248), 2022-10-16
Supplement: s1 [file s1]

## Supporting Information

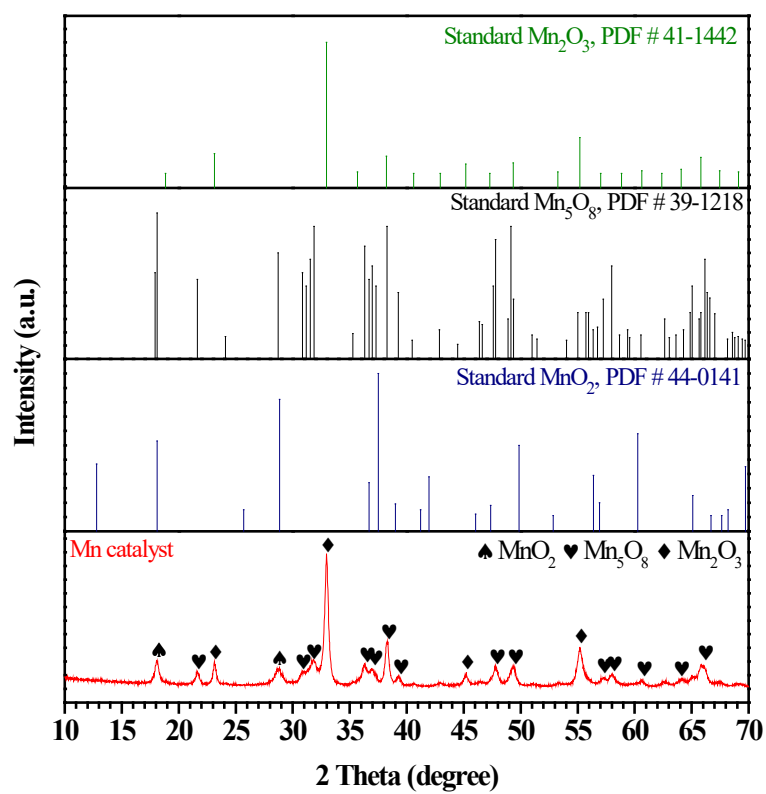

**Figure S1.** XRD patterns of the Mn samples and the standard patterns of  $\text{MnO}_2$ ,  $\text{Mn}_5\text{O}_8$ , and  $\text{Mn}_2\text{O}_3$  phases.

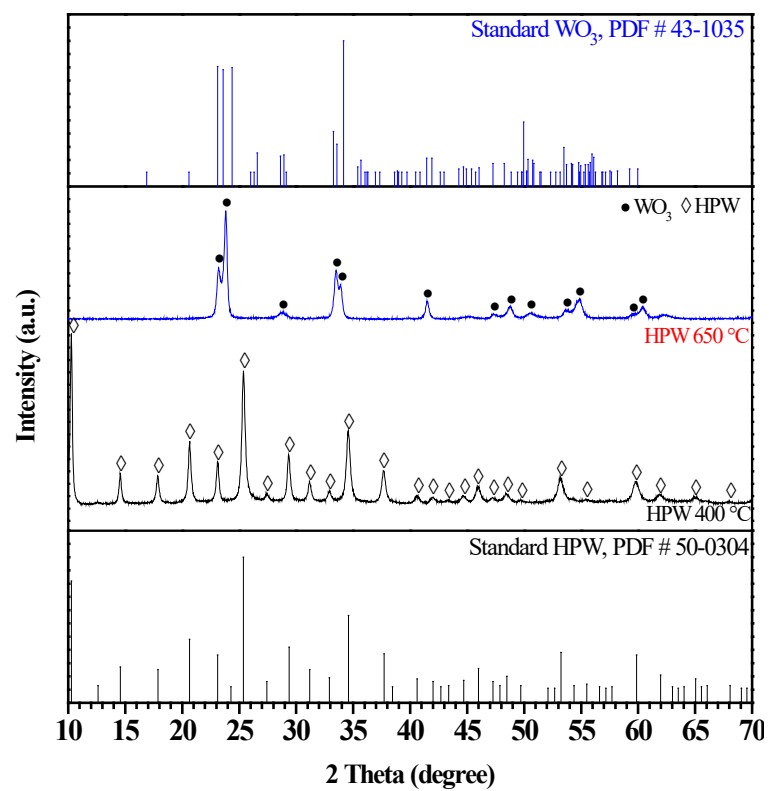

**Figure S2.** XRD patterns of HPW calcinated at 400 °C and 650 °C; the standard patterns of HPW and  $\text{WO}_3$  phases.

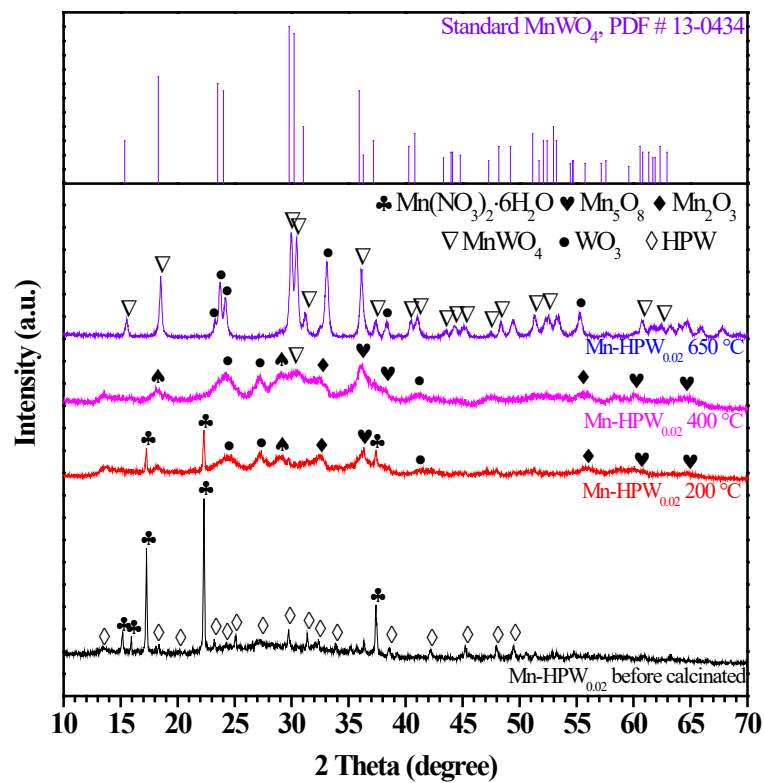

**Figure S3.** XRD patterns of Mn-HPW<sub>0.02</sub> before calcination, Mn-HPW<sub>0.02</sub> calcinated at 200 °C, 400 °C, and 650 °C; the standard patterns of MnWO<sub>4</sub> phases.

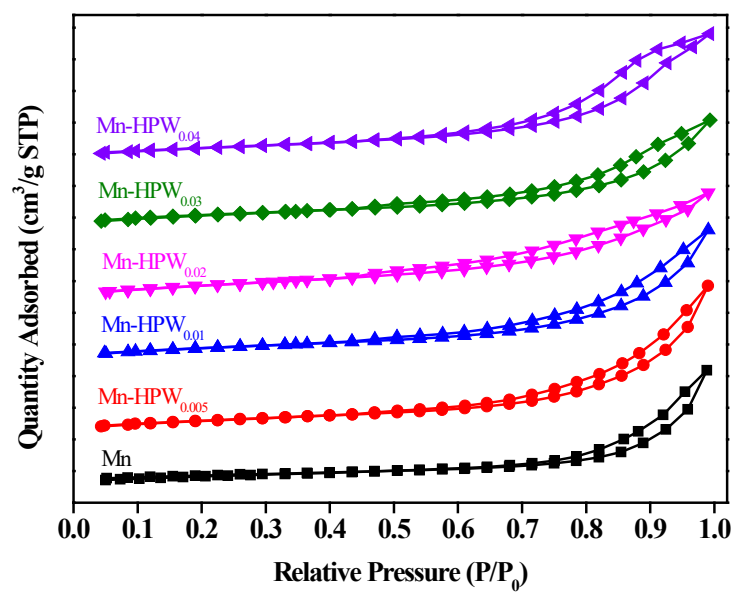

**Figure S4.** N<sub>2</sub> adsorption-desorption isotherms on the Mn and Mn-HPW<sub>x</sub> catalysts.

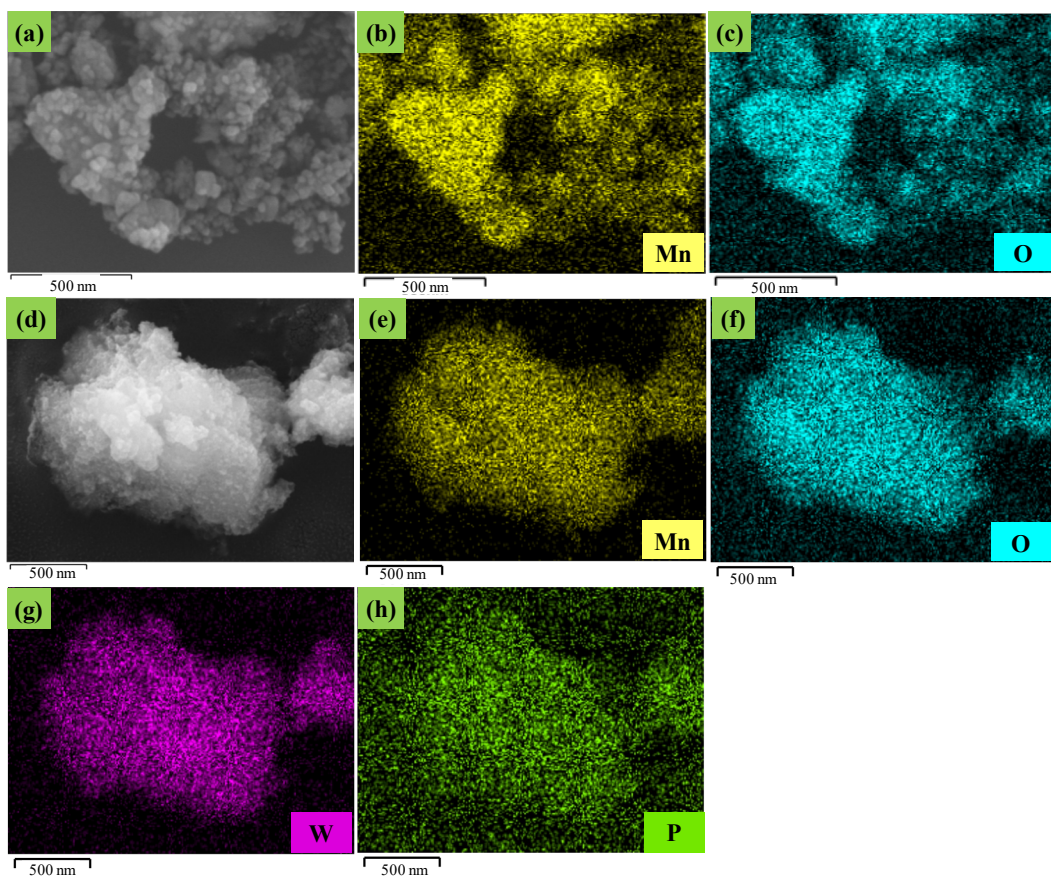

**Figure S5.** EDX mapping of Mn (a-c) and Mn-HPW<sub>0.02</sub> (d-h).

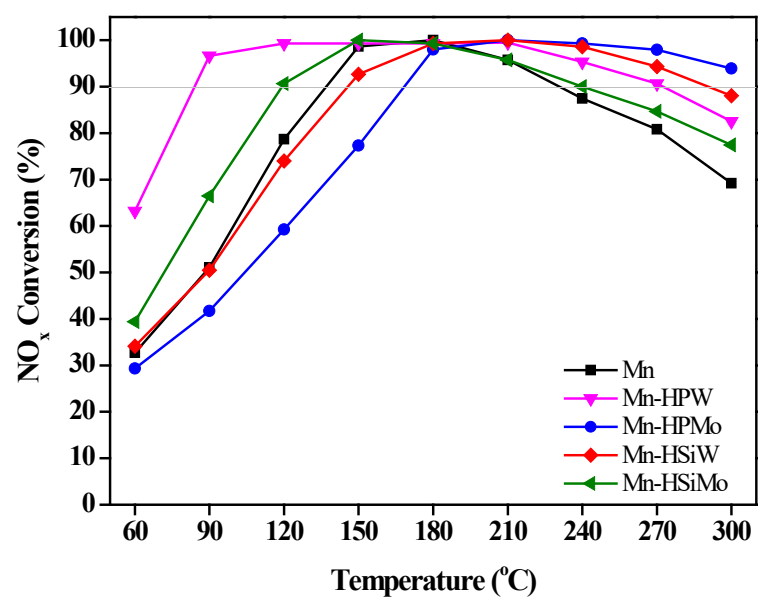

**Figure S6.** NH<sub>3</sub>-SCR activity on Mn, Mn-HPW, Mn-HPMo, Mn-HSiW, and Mn-HSiMo at 60-300 °C.

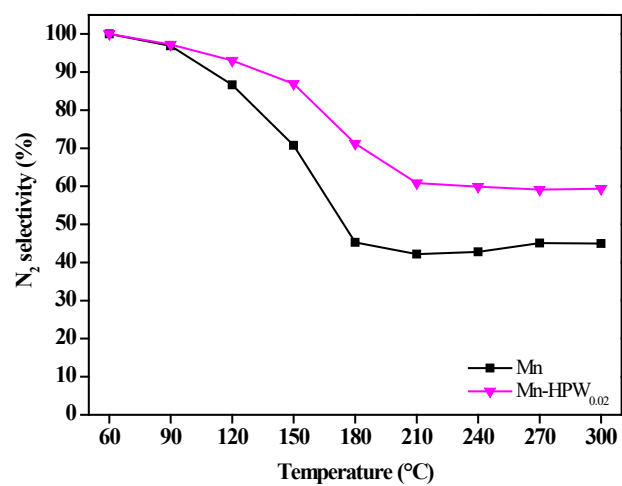

**Figure S7.** N<sub>2</sub> selectivity on the Mn and Mn-HPW<sub>0.02</sub> catalysts at 60-300 °C.

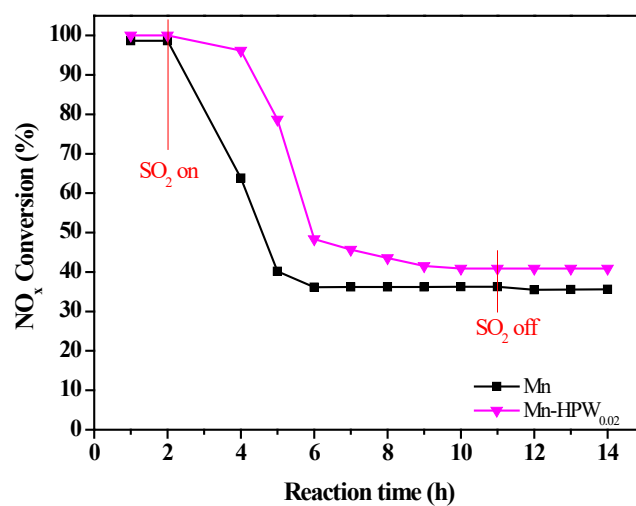

**Figure S8.** Effect of 50 ppm SO<sub>2</sub> on NH<sub>3</sub>-SCR activity over the Mn and Mn-HPW<sub>0.02</sub> catalysts at 150 °C.



**Table S1.** Representative Mn-based catalysts decorated by different assistant for NH<sub>3</sub>-SCR.

| Catalyst               | NO <sub>x</sub> conversion | Reaction condition |                    |                   |           |                         |               |            | Reference    |
|------------------------|----------------------------|--------------------|--------------------|-------------------|-----------|-------------------------|---------------|------------|--------------|
|                        |                            | [NO]               | [NH <sub>3</sub> ] | [O <sub>2</sub> ] | Flow rate | GHSV (h <sup>-1</sup> ) | WHSV (mL/g·h) | Weight (g) |              |
|                        |                            | (ppm)              | (ppm)              | (%)               | (mL/min)  |                         |               |            |              |
| Mn-Nb                  | > 90% (125-200 °C)         | 500                | 500                | 5                 | 500       | 50,000                  | ——            | ——         | [58]         |
| Mn-Co                  | > 90% (125-350 °C)         | 500                | 500                | 3                 | 210       | 38,000                  | ——            | 0.40       | [30]         |
| Mn-Sm                  | > 90% (75-200 °C)          | 500                | 500                | 5                 | ——        | 48,600                  | ——            | 0.30       | [53]         |
| Mn-Fe                  | ~100% (120-240 °C)         | 500                | 500                | 5                 | 600       | 36,000                  | ——            | 0.47       | [28]         |
| Mn-Eu                  | > 90% (100-400 °C)         | 600                | 600                | 5                 | 1000      | 108,000                 | ——            | 0.28       | [59]         |
| Mn-Cu                  | > 90% (125-225 °C)         | 500                | 500                | 3                 | 200       | 100,000                 | ——            | 0.15       | [60]         |
| Mn-Ni                  | ~100% (150-300 °C)         | 600                | 600                | 5                 | 375       | 45000                   | ——            | ——         | [61]         |
| Mn-Ce                  | > 90% (120-180°C)          | 500                | 500                | 2                 | 100       | 11,000                  | 30,000        | 0.20       | [62]         |
| Mn-Ce                  | > 90% (100-400 °C)         | 500                | 500                | 5                 | 200       | 32,000                  | ——            | ——         | [63]         |
| Mn-HPW <sub>0.02</sub> | > 90% (90-270 °C)          | 500                | 500                | 5                 | 200       | ——                      | 80,000        | 0.15       | In this work |

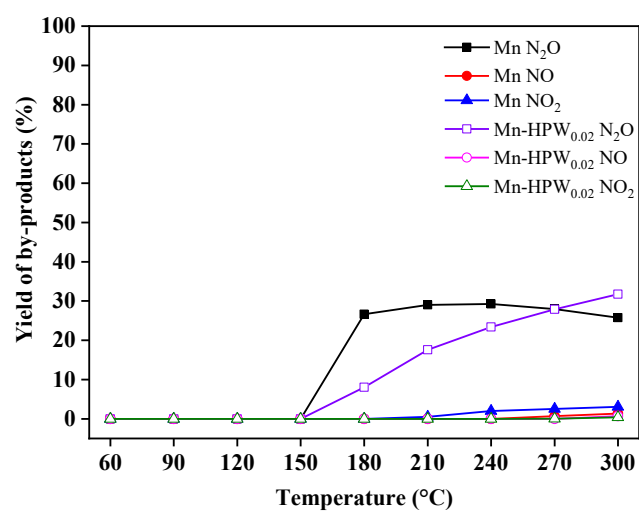

**Figure S9.** Yield of N<sub>2</sub>O, NO, and NO<sub>2</sub> on Mn and Mn-HPW<sub>0.02</sub> at 60-300 °C.

**Table S2** Reduction temperature and relative ratio in H<sub>2</sub>-TPR curves.

| Catalyst                | Reduction temperature (°C) |         | Relative ratio |         |
|-------------------------|----------------------------|---------|----------------|---------|
|                         | Peak I                     | Peak II | Peak I         | Peak II |
| Mn                      | 315                        | 470     | 1.00 *         | 1.00 *  |
| Mn-HPW <sub>0.005</sub> | 315                        | 470     | 0.62           | 0.91    |
| Mn-HPW <sub>0.01</sub>  | 315                        | 480     | 0.55           | 0.66    |
| Mn-HPW <sub>0.02</sub>  | 315                        | 490     | 0.51           | 0.60    |
| Mn-HPW <sub>0.03</sub>  | 315                        | 470     | 0.34           | 0.31    |
| Mn-HPW <sub>0.04</sub>  | 308                        | 470     | 0.18           | 0.27    |

\* The area of peak I and peak II over the Mn catalyst is set as 1.00, respectively, compare with other catalysts.

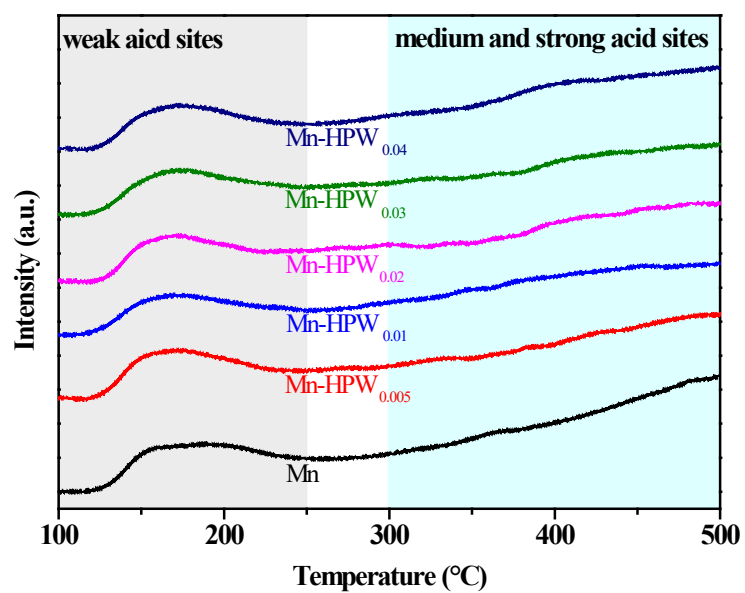

**Figure S10.** NH<sub>3</sub>-TPD profiles of the Mn and Mn-HPW<sub>x</sub> catalysts.

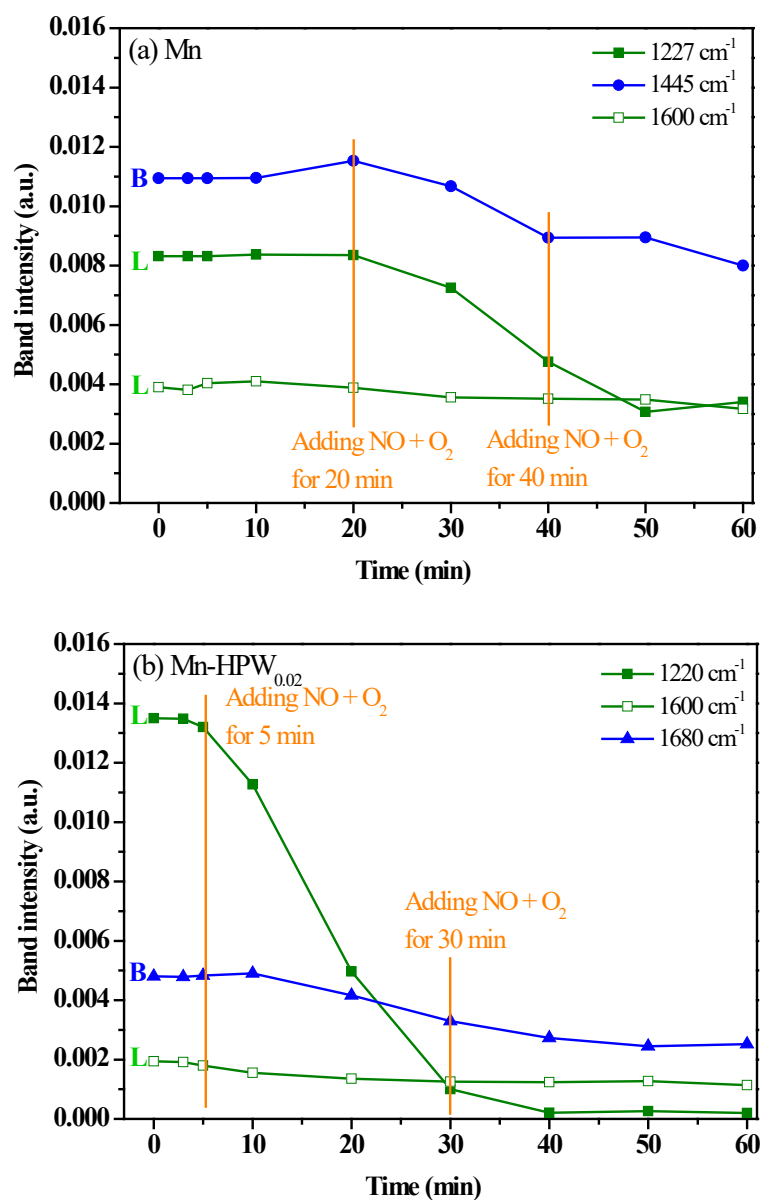

**Figure S11.** Dependence of the band intensities of NH<sub>3</sub>-derived species on time over Mn (a) and Mn-HPW<sub>0.02</sub> (b).

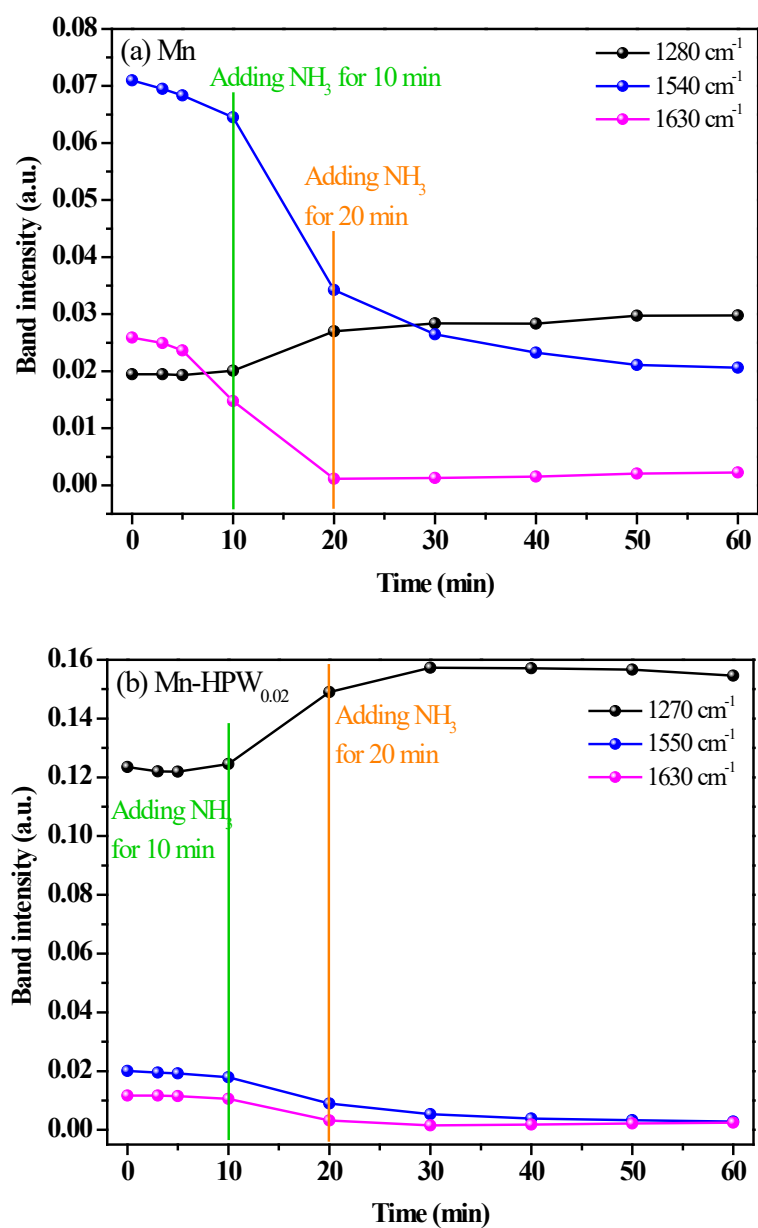

**Figure S12.** Dependence of the band intensities of the NO<sub>x</sub>-derived species on time over Mn (a) and Mn-HPW<sub>0.02</sub> (b).
